# Supplementary material for: Effect of exercise training on skeletal muscle protein expression in relation to insulin sensitivity: Per‐protocol analysis of a randomized controlled trial (GO‐ACTIWE)
Source: PubMed Central journal article supplement (PMC8157763; doi:10.14814/phy2.14850), 2021-05-27
Supplement: PHY2-9-e14850-s001.pdf [file PHY2-9-e14850-s001.pdf]

## Supplementary:

**Table S1:** Summary of raw data for body weight, cardiorespiratory fitness and insulin sensitivity at baseline and following 3 and 6 months of intervention

|                                              | CON (n=12)         | BIKE (n=14)        | MOD (n=28)          | VIG (n=18)         |
|----------------------------------------------|--------------------|--------------------|---------------------|--------------------|
| <b>Body weight (kg)</b>                      |                    |                    |                     |                    |
| Baseline                                     | 93.0 (90.3; 101.5) | 90.0 (81.5; 100.4) | 92.9 (79.7; 97.2)   | 90.7 (81.7; 104.7) |
| 3 months                                     | 96.4 (89.6; 105.8) | 87.2 (81.3; 97.9)  | 92.1 (78.5; 98.2)   | 92.1 (79.5; 102.1) |
| 6 months                                     | 97.9 (88.1; 106.9) | 86.0 (81.8; 95.2)  | 92.1 (77.9; 98.1)   | 92.2 (77.8; 101.4) |
| <b>Cardiorespiratory fitness (mL/min/kg)</b> |                    |                    |                     |                    |
| Baseline                                     | 30.5 (23.8; 35.6)  | 30.8 (27.3; 34.1)  | 30.8 (27.0; 33.4)   | 30.6 (26.2; 32.4)  |
| 3 months                                     | 29.5 (25.5; 31.2)  | 34.4 (29.8; 40.0)  | 33.1 (28.3; 36.1)   | 34.0 (31.6; 36.7)  |
| 6 months                                     | 29.0 (23.7; 33.2)  | 35.8 (30.6; 40.9)  | 34.4 (28.7; 37.5)   | 35.6 (31.6; 38.9)  |
| <b>Insulin sensitivity (mg/min/pM)</b>       |                    |                    |                     |                    |
| Baseline                                     | 0.67 (0.49; 0.82)  | 0.66 (0.47; 0.98)  | 0.66 (0.52; 0.75)*  | 0.63 (0.47; 0.96)  |
| 3 months                                     | 0.71 (0.46; 0.85)  | 0.74 (0.59; 1.14)  | 0.75 (0.60; 0.98)** | 0.84 (0.55; 1.21)  |
| 6 months                                     | 0.69 (0.40; 0.85)  | 0.89 (0.66; 1.02)  | 0.85 (0.50; 1.10)   | 0.79 (0.58; 1.14)  |

Data are presented as median (25<sup>th</sup> and 75<sup>th</sup> percentile). Insulin sensitivity: glucose infusion rate measured by the hyperinsulinaemic euglycaemic clamp divided by insulin levels during the clamp. \* n= 27. \*\* n=26. Abbreviations: CON: control group; BIKE: active commuting group; MOD: moderate intensity exercise group; VIG: vigorous intensity exercise group

**Table S2:** Association analysis between insulin sensitivity and protein expression across all time points

|               |                  |       |
|---------------|------------------|-------|
| <b>IR</b>     | 0.1 (-6.4; 7.0)  | 0.972 |
| <b>Akt2</b>   | 2.3 (-5.4; 10.5) | 0.565 |
| <b>AMPKa2</b> | 3.6 (-2.7; 10.3) | 0.266 |
| <b>TBC1D4</b> | 0.0 (-6.4; 6.9)  | 1.000 |
| <b>GLUT4</b>  | 8.3 (0.4; 16.8)  | 0.039 |
| <b>HKII</b>   | 4.0 (-2.8; 11.3) | 0.253 |
| <b>GS</b>     | 0.9 (-5.6; 7.9)  | 0.785 |
| <b>PDH</b>    | 7.6 (0.1; 15.6)  | 0.046 |

Results are presented as percentage change (95% confidence interval) in insulin sensitivity per 1 SD change in protein expression. Data for Akt2, AMPK $\alpha$ 2 and HKII were log-transformed for analysis. IR: Insulin receptor; Akt2: Rac-beta serine/threonine-protein kinase 2; AMPK $\alpha$ 2: 5'-AMP-activated protein kinase catalytic subunit alpha-2; TBC1D4: TBC1 domain family member 4; GLUT4: Glucose transporter 4; HKII: hexokinase 2; GS: glycogen synthase; PDH: pyruvate dehydrogenase.

**Figure S1:** Protein expression in the groups at baseline (blue) and following 3 (red) and 6 (green) months of intervention (raw data)

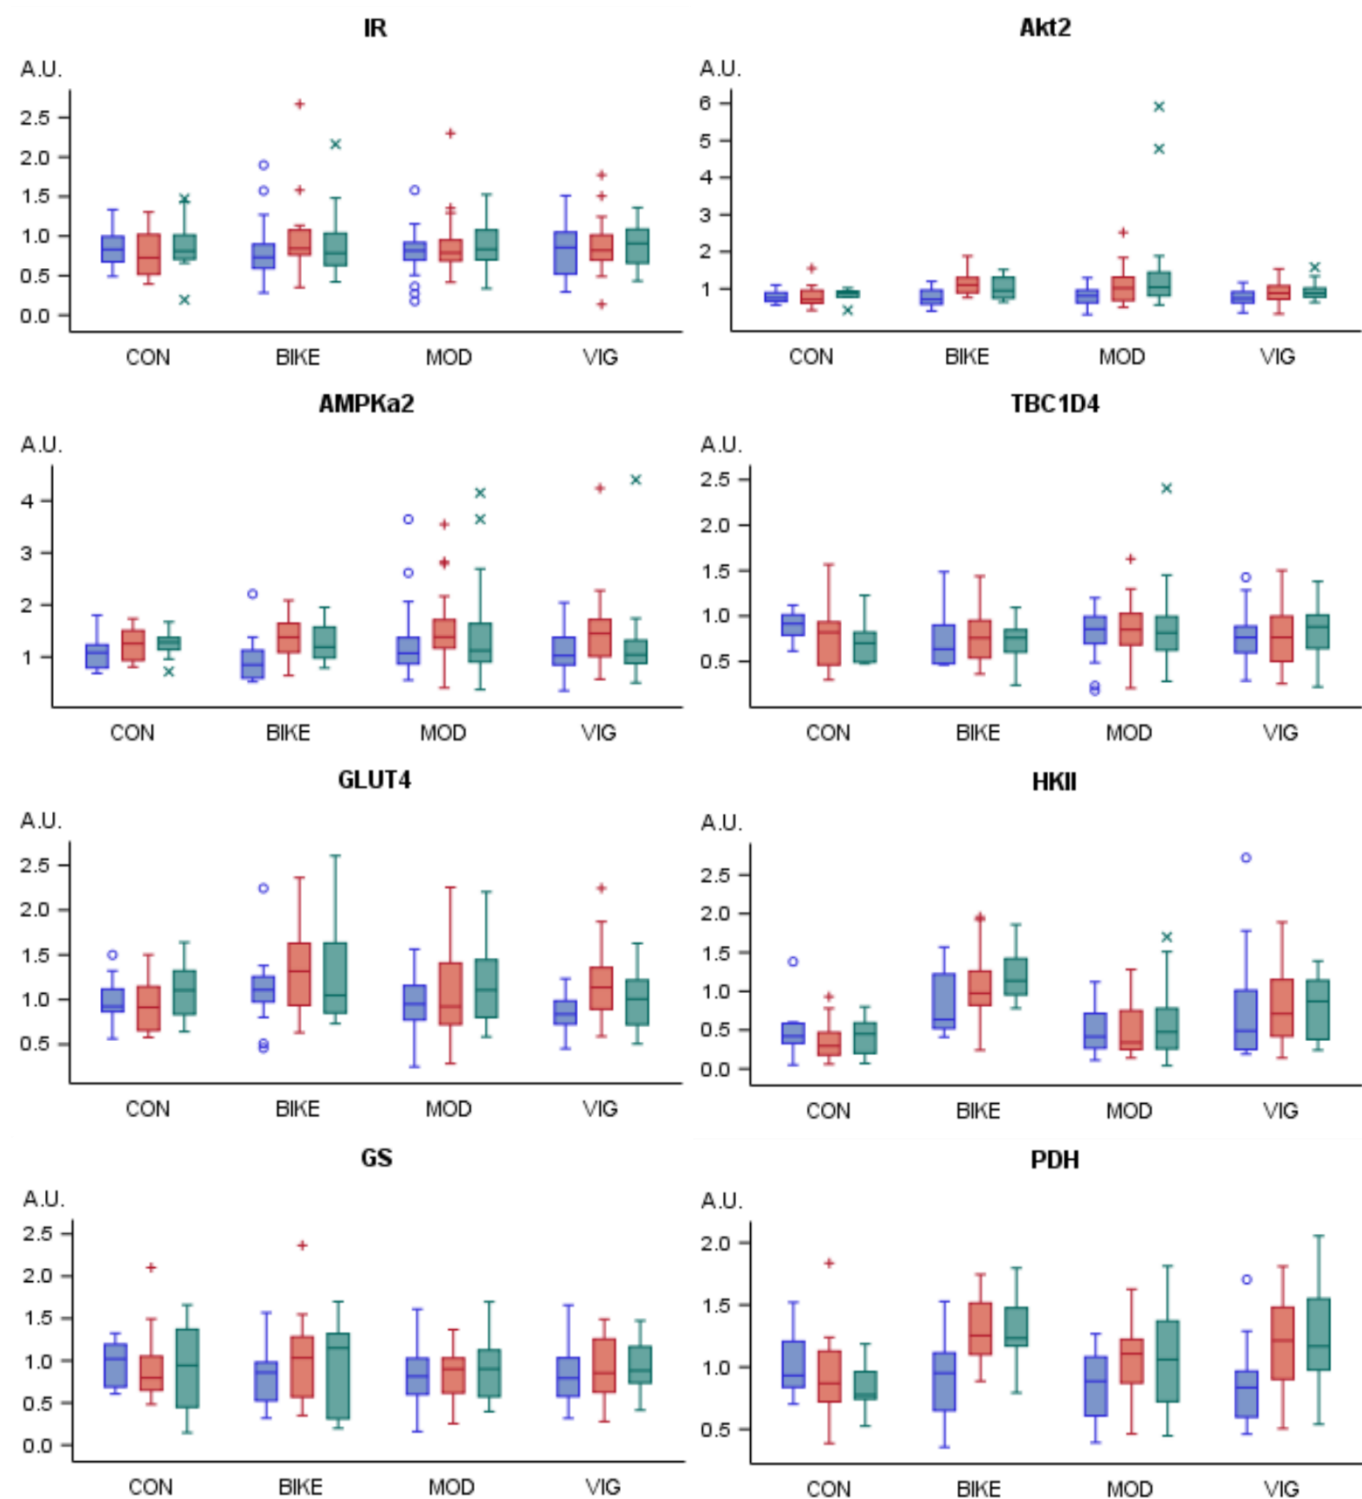

The box indicates the interquartile range, the line the median and the whiskers the 5<sup>th</sup> and 95<sup>th</sup> percentile in arbitrary units. Individual markers indicate outliers (1.5 interquartile ranges above the 75<sup>th</sup> percentile). At 3 months, protein expression data were missing for three participants in MOD and one in VIG. At 6 months, two participants in CON, BIKE and MOD, plus one in VIG, were missing protein expression data. Abbreviations: Akt2: Rac-beta serine/threonine-protein kinase 2; AMPK $\alpha$ 2: 5'-AMP-activated protein kinase catalytic subunit alpha-2; BIKE: active commuting group; CON: control group; GLUT4: Glucose transporter 4; GS: glycogen synthase; IR: Insulin receptor; HKII: hexokinase 2; MOD: moderate intensity exercise group; PDH: pyruvate dehydrogenase; TBC1D4: TBC1 domain family member 4; VIG: vigorous intensity exercise group.

**Figure S2:** Representative Western blot images

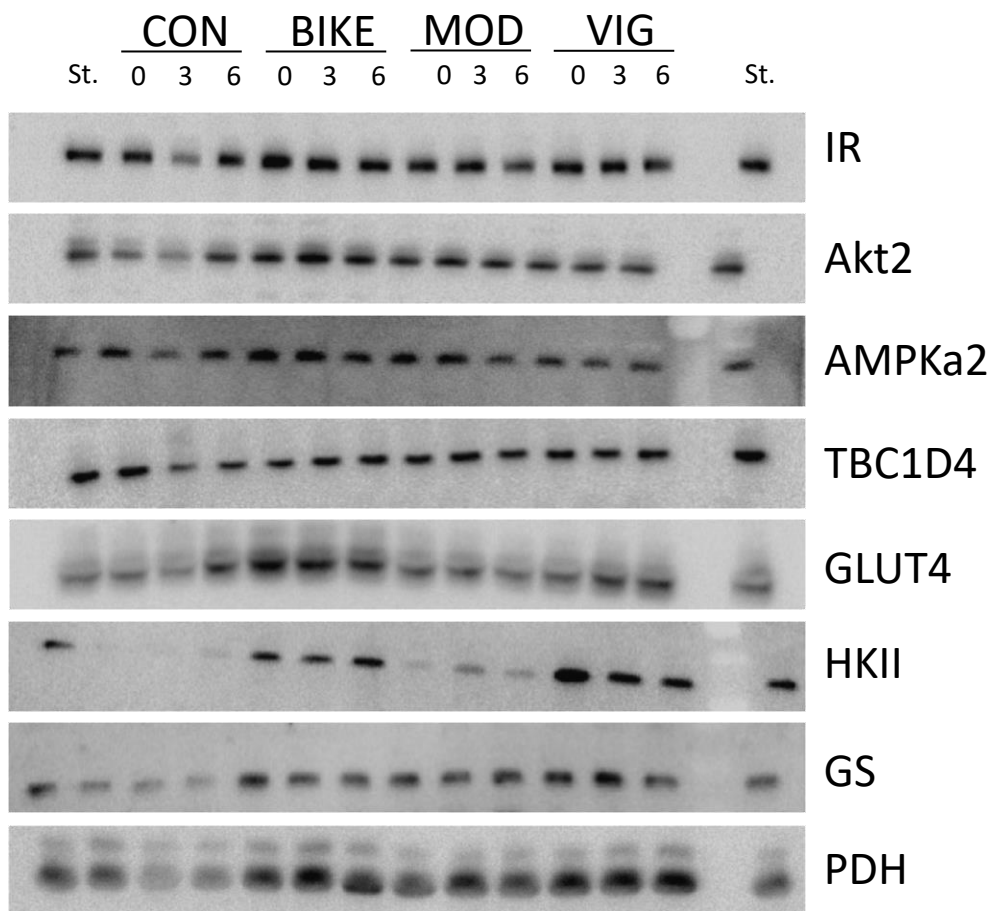

Protein expression of IR, Akt2, AMPKa2, TBC1D4, Glut4, HKII, GS and PDH in *m. vastus lateralis*.

Abbreviations: Akt2: Rac-beta serine/threonine-protein kinase 2; AMPKa2: 5'-AMP-activated protein kinase catalytic subunit alpha-2; BIKE: active commuting group; CON: control group; GLUT4: Glucose transporter 4; GS: glycogen synthase; IR: Insulin receptor; HKII: hexokinase 2; MOD: moderate intensity exercise group; PDH: pyruvate dehydrogenase; St.: standard sample; TBC1D4: TBC1 domain family member 4; VIG: vigorous intensity exercise group.
